# Supplementary material
Source: PubMed Central journal article supplement (PMC5730407)
Supplement: NIHMS896487-supplement.pdf [file NIHMS896487-supplement.pdf]

## Vicarious Social Defeat Stress Induces Depression-related Outcomes in Female Mice

### *Supplemental Information*

#### **Supplemental Methods**

##### **Animals**

Eight-week old female and male c57BL/6 mice were purchased from Charles River laboratories (Hollister, CA). Since the social defeat model of depression involves conflict stress (i.e., physical threat) from a more dominant resident counterpart (1), we also purchased retired CD1 male breeders to be used as aggressors for this investigation (2). Prior to vicarious defeat stress (VDS)-exposure, CD1 aggressors were single housed, while c57BL/6 mice were housed with littermates of the same sex and age, in groups of 3-4, in standard polypropylene cages containing wood shavings. Mice were maintained in a colony room with a 12-h light/dark cycle (lights on at 7:00 h), and with access to food and water *ad libitum*. Experiments were conducted in compliance with the National Institutes of Health *Guide for the Care and Use of Laboratory Animals*, and with approval of the Institutional Animal Care and Use Committee at the University of Texas at El Paso.

##### **Control (CON) Housing Conditions**

During the 10 days of VDS, ES females were housed adjacent to a novel aggressor after witnessing a defeat bout (Fig. 1B), whereas PS males were housed adjacent to its aggressor following the defeat episode (Fig. 1C). Thus, we conducted an additional experiment where a separate group of female ES mice was also housed overnight in the compartment next to the CD1 aggressor they had just witnessed aggress a conspecific (Table S1, Cohort 10). This approach was taken to match the male PS housing condition during VDS (as in Figure 1C).

Additional CON housing conditions (female paired with female; Fig. 1D) were included in order to evaluate baseline social interaction levels as a function of chemosensory stimuli (Table S1, Cohort 9). To do this, a separate group of female CONs were exposed to the bedding of PS male mice, across the 10 days of VDS. Similarly, a

separate group of CON female mice were housed as in Fig. 1D; however, in this case, they were house-paired with a male CD1 mouse that the female had not previously seen display aggressive behavior towards a conspecific.

### **Corticosterone Immunoassay**

A separate set of female c57BL/6 mice was used to examine how VDS would influence the activation of the HPA axis, as inferred by levels of trunk blood serum corticosterone (3). Forty min after the tenth episode of VDS, female mice were decapitated, and trunk blood was collected into standard Heparin-coated collection tubes and placed on ice (4, 5). This time frame was selected because maximum activation of the HPA axis has a latency of 20-40 min post last defeat (6) – remaining elevated 1-24 hours after, in both the social- and witness-defeat paradigms, in male c57BL/6 mice (7, 8). As previously described (9), blood samples were centrifuged (3,000g for 10 min at 4°C) to obtain serum for corticosterone analysis. Corticosterone was analyzed by enzyme-linked immunosorbent assay kit (Neogen; Lexington, KY). Plates were read in a BioPlex Bead Array Reader (BioRad; Hercules, CA).

### **Sucrose Preference**

The sucrose preference test has been widely implemented across the literature to examine the effects of stress-induced anhedonia (10). The test consisted of a 2-bottle procedure in which mice were given the choice between consuming water or a 1% sucrose solution (11, 12). Here, mice were habituated to drink water from two separate bottles during the first five days of the VDS procedure (i.e., PD70-74) – the two drinking bottles were located on the side that housed the experimental c57BL/6 mice (i.e., the left side of the cage; Fig 1B-C). On day six of VDS exposure (PD75), one of the bottles was replaced with a 1% sucrose solution, while the other bottle contained water. Water and sucrose consumption was measured every day prior to the beginning of the last five VDS bouts (PD75-79), as well as 24 h post stress regimen (PD80). The position of the sucrose bottle was balanced (left vs. right) across the different cages to control for potential side-preference bias. Preference for sucrose over water (sucrose/[sucrose + water]) was used

as a measure for sensitivity to reward (13). Total liquid intake was normalized to body weight ( $[\text{water} + \text{sucrose}]/\text{body weight}$ ).

### **Tail Suspension Test**

The tail suspension test is a behavioral procedure in which rodents are hung in an uncontrollable fashion by their tail for 6 min (14). Initially, mice engage in escape-directed behaviors but eventually adopt a posture of immobility – however, pharmacological antidepressant treatment can significantly increase their escape-directed behaviors, an effect that has been correlated with pharmacological antidepressant efficacy in humans (15). Conversely, an animal that spends more time immobile is considered to be more sensitive to the effects of inescapable stress (16). The total time (sec) spent immobile, during the last 5 min of the test, was the dependent variable.

### **Elevated Plus Maze**

The elevated plus maze is a classic test of anxiety-like behavior (17), that uses the natural reluctance of rodents to explore open spaces (18). The maze (Stoelting®, Wood Dale, IL) was made of gray plastic and consisted of two perpendicular intersecting runways (5 cm wide X 35 cm long). One runway had tall walls (closed arms; 15 cm in height), and the other one had no walls (open arms). The arms were connected together by a central area (5 X 5 cm), and the maze was elevated 40 cm from the floor. At the beginning of the test, under controlled light conditions (~90 lux), mice were placed in the central area, facing one of the open arms, and the cumulative time spent in the open-arms was recorded using a video tracking system (19).

### **Statistical Analysis**

Data was analyzed using ANOVA techniques, with stress (CON, ES, PS), drug (saline, ketamine, chlordiazepoxide), as well as day of sucrose exposure and body weight (repeated measures), as sources of variance. Tukey post hoc tests were conducted to identify differences between the groups. Analyses implicating two-group comparisons were performed with Student's t-tests. Data are presented as mean + SEM. Statistical significance

**Supplemental Figures**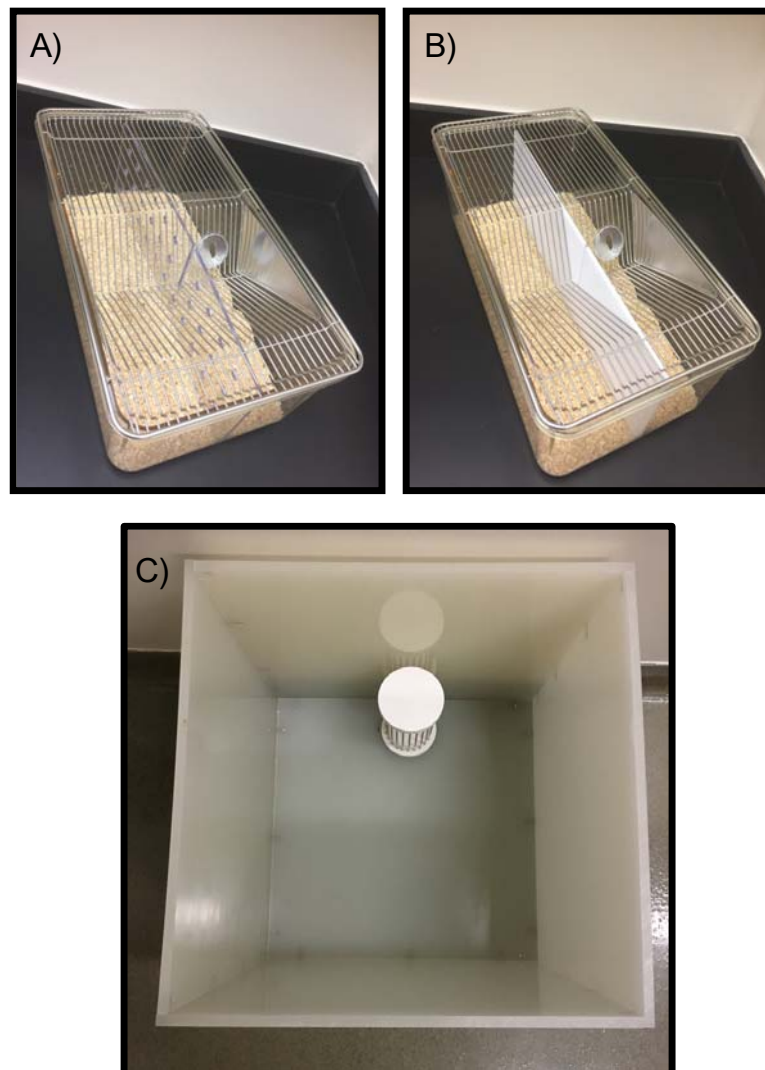

**Figure S1.** Photograph of defeat cages, with wood shavings bedding, used during the vicarious social defeat stress paradigm (Ancare<sup>®</sup>, N40 Large Mouse Cage and wire top). **(A)** Defeat mouse cage with fitted clear plexiglass divider with 1 cm diameter perforated holes. **(B)** Defeat mouse cage with fitted white opaque divider without holes. **(C)** Photograph of squared open field arena with a white circular wire cage (Stoelting Co.<sup>®</sup> Mouse Stranger Enclosure #60452), used during the social interaction test.

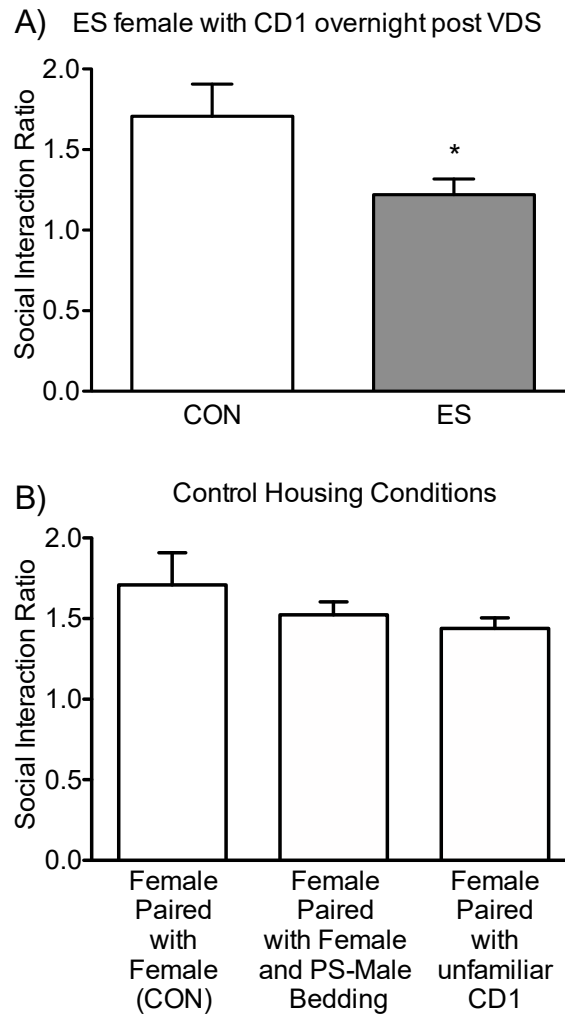

**Figure S2.** (A) Social interaction ratio of female mice exposed to emotional/psychological stress (ES) that spent 24 h with CD1-male aggressor (overnight), which physically defeated a c57BL/6-male conspecific (PS). After 10 days of vicarious defeat stress (VDS), the ES-female group spent significantly less time in the interaction zone, when compared to controls (CON; n=11; female house-paired with another female), 24 hours post last stress exposure. (B) Housing and chemosensory conditions do not influence baseline levels of social interaction in CON female mice (i.e., females that do not experience VDS). Specifically, no differences in time spent in the social interaction zone were evident between females CONs (house-paired with separate female) and females housed in similar conditions but also exposed to the bedding of physically stressed (PS) male mice (n=12), or pair-housed with an unfamiliar CD1 male mouse (n=10). Note: CON group in sections A and B are the same group (Table S1, Cohort 1). \* $p > 0.05$ .

**Table S1. Experimental groups.**

| Cohort | Stress   | n  | Sex    | Procedure I             | Interval | Procedure II                                   | Data                  |
|--------|----------|----|--------|-------------------------|----------|------------------------------------------------|-----------------------|
| 1      | CON      | 11 | Female | VDS                     | 24 hr    | Social Interaction                             | Figure 2              |
|        | ES       | 11 | Female |                         |          |                                                |                       |
|        | CON      | 11 | Male   |                         |          |                                                |                       |
|        | ES       | 11 | Male   |                         |          |                                                |                       |
|        | PS       | 11 | Male   |                         |          |                                                |                       |
| 2      | CON      | 11 | Female | VDS                     | 24 hr    | Social Interaction with Same Strain/Sex Target | Figure 3A<br>Figure 4 |
|        | ES       | 11 | Female |                         |          |                                                |                       |
| 3      | CON      | 10 | Female | VDS with Opaque Divider | 24 hr    | Social Interaction                             | Figure 3B             |
|        | ES       | 10 | Female |                         |          |                                                |                       |
| 4      | CON      | 8  | Female | VDS                     | 40 min   | Blood Collection<br>Corticosterone Assay       | Figure 3C             |
|        | ES       | 6  | Female |                         |          |                                                |                       |
| 5      | CON      | 10 | Female | VDS                     | 24 hr    | Sucrose Preference                             | Figure 5              |
|        | ES       | 10 | Female |                         |          |                                                |                       |
| 6      | CON      | 9  | Female | VDS                     | 24 hr    | Tail Suspension                                | Figure 6A             |
|        | ES       | 11 | Female |                         |          |                                                |                       |
| 7      | CON      | 12 | Female | VDS                     | 24 hr    | Elevated Plus Maze                             | Figure 6B             |
|        | ES       | 11 | Female |                         |          |                                                |                       |
| 8      | CON      | 18 | Female | VDS                     | 24 hr    | Pharmacological Study                          | Figure 7              |
|        | ES/SAL   | 8  | Female |                         |          |                                                |                       |
|        | ES/KET   | 8  | Female |                         |          |                                                |                       |
|        | ES/CHLR  | 10 | Female |                         |          |                                                |                       |
| 9      | CON*     | 11 | Female | CON Housing             | 24 hr    | Social Interaction                             | Figure S2A            |
|        | CON/BEDD | 12 | Female |                         |          |                                                |                       |
|        | CON/CD1  | 10 | Female |                         |          |                                                |                       |
| 10     | CON*     | 11 | Female | VDS Overnight with CD1  | 24 hr    | Social Interaction                             | Figure S2B            |
|        | ES       | 11 | Female |                         |          |                                                |                       |

BEDD, bedding from physically stressed male mice; CHLR, chlordiazepoxide; CON, non-stressed control; ES, emotional/psychological stress; KET, ketamine; PS, physical stress; SAL, saline; VDS, vicarious defeat stress; \*Same group in cohort 1.

## Supplemental References

1. Kudryavtseva NN, Bakshtanovskaya IV, Koryakina LA (1991): Social model of depression in mice of C57BL/6J strain. *Pharmacol Biochem Behav* 38:315-320.
2. Parmigiani S, Palanza P, Rogers J, Ferrari PF (1999): Selection, evolution of behavior and animal models in behavioral neuroscience. *Neurosci Biobehav Rev* 23:957-969.
3. Backstrom T, Winberg S (2013): Central corticotropin releasing factor and social stress. *Front Neurosci* 7:117.
4. Krishnan V, Han MH, Graham DL, Berton O, Renthal W, Russo SJ, et al. (2007): Molecular adaptations underlying susceptibility and resistance to social defeat in brain reward regions. *Cell* 131:391-404.
5. Iñiguez SD, Riggs LM, Nieto SJ, Dayrit G, Zamora NN, Shawhan KL, et al. (2014): Social defeat stress induces a depression-like phenotype in adolescent male c57BL/6 mice. *Stress* 17:247-255.
6. Heinrichs SC, Koob GF (2006): Application of experimental stressors in laboratory rodents. *Current protocols in neuroscience / editorial board, Jacqueline N Crawley [et al]* Chapter 8:Unit8.4.
7. Sial OK, Warren BL, Alcantara LF, Parise EM, Bolanos-Guzman CA (2016): Vicarious social defeat stress: Bridging the gap between physical and emotional stress. *J Neurosci Methods* 258:94-103.
8. Warren BL, Vialou VF, Iñiguez SD, Alcantara LF, Wright KN, Feng J, et al. (2013): Neurobiological sequelae of witnessing stressful events in adult mice. *Biol Psychiatry* 73:7-14.
9. Sebastian V, Estil JB, Chen D, Schrott LM, Serrano PA (2013): Acute physiological stress promotes clustering of synaptic markers and alters spine morphology in the hippocampus. *PloS one* 8:e79077.
10. Willner P, Towell A, Sampson D, Sophokleous S, Muscat R (1987): Reduction of sucrose preference by chronic unpredictable mild stress, and its restoration by a tricyclic antidepressant. *Psychopharmacology (Berl)* 93:358-364.
11. Parise EM, Alcantara LF, Warren BL, Wright KN, Hadad R, Sial OK, et al. (2013): Repeated ketamine exposure induces an enduring resilient phenotype in adolescent and adult rats. *Biol Psychiatry* 74:750-759.
12. Wallace DL, Vialou V, Rios L, Carle-Florence TL, Chakravarty S, Kumar A, et al. (2008): The influence of DeltaFosB in the nucleus accumbens on natural reward-related behavior. *J Neurosci* 28:10272-10277.
13. Warren BL, Iñiguez SD, Alcantara LF, Wright KN, Parise EM, Weakley SK, et al. (2011): Juvenile administration of concomitant methylphenidate and fluoxetine alters behavioral reactivity to reward- and mood-related stimuli and disrupts ventral tegmental area gene expression in adulthood. *J Neurosci* 31:10347-10358.
14. Steru L, Chermat R, Thierry B, Simon P (1985): The tail suspension test: a new method for screening antidepressants in mice. *Psychopharmacology (Berl)* 85:367-370.
15. Cryan JF, Mombereau C, Vassout A (2005): The tail suspension test as a model for assessing antidepressant activity: review of pharmacological and genetic studies in mice. *Neurosci Biobehav Rev* 29:571-625.

16. Iñiguez SD, Vialou V, Warren BL, Cao JL, Alcantara LF, Davis LC, et al. (2010): Extracellular signal-regulated kinase-2 within the ventral tegmental area regulates responses to stress. *J Neurosci* 30:7652-7663.
17. Montgomery KC (1955): The relation between fear induced by novel stimulation and exploratory behavior. *J Comp Physiol Psychol* 48:254-260.
18. Pellow S, Chopin P, File SE, Briley M (1985): Validation of open:closed arm entries in an elevated plus-maze as a measure of anxiety in the rat. *J Neurosci Methods* 14:149-167.
19. Iñiguez SD, Alcantara LF, Warren BL, Riggs LM, Parise EM, Vialou V, et al. (2014): Fluoxetine exposure during adolescence alters responses to aversive stimuli in adulthood. *J Neurosci* 34:1007-1021.
